# Supplementary material for: MALDI-TOF MS Using a Custom-Made Database, Biomarker Assignment, or Mathematical Classifiers Does Not Differentiate Shigella spp. and Escherichia coli
Source: MDPI journal article supplement (doi:10.3390/microorganisms10020435), 2022-02-14
Supplement: s1 [file s1]

**Supplementary Figure S1.** Decision diagrams of assigned biomarkers  
a. Biomarkers at genus level. b. Biomarkers at pathotype level. c. Biomarkers at group level

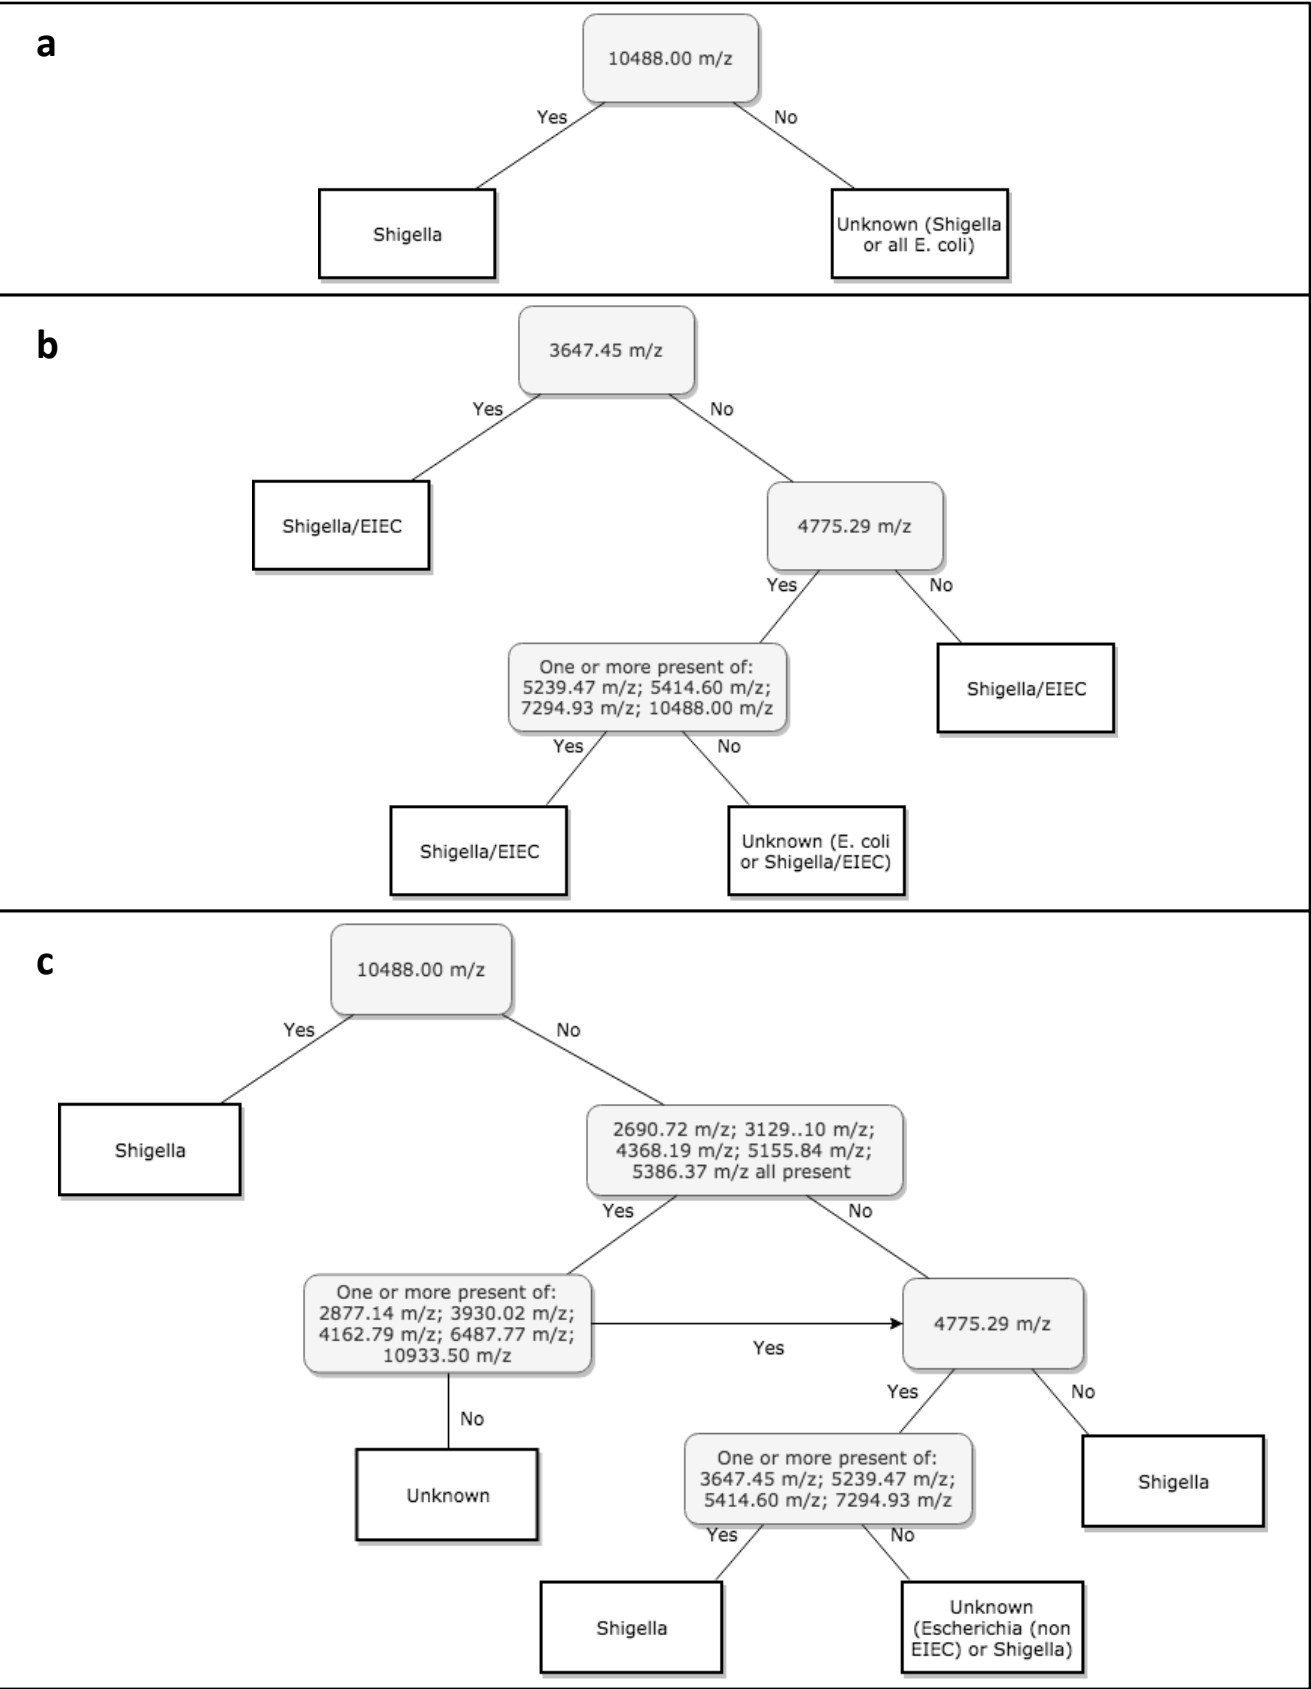

**Supplementary Table S1.** Comparison of performance of a custom-made database and classifiers based on all 288

isolates or based on an evenly distribution of 17 isolates for each species (6\*17)

| Correct identification with MALDI-TOF, direct smear: |                                                       |                                                        |                                                    |                                                     | Correct identification with MALDI-TOF, ethanol-formic acid extraction: |                                                        |                                                    |                                                     |
|------------------------------------------------------|-------------------------------------------------------|--------------------------------------------------------|----------------------------------------------------|-----------------------------------------------------|------------------------------------------------------------------------|--------------------------------------------------------|----------------------------------------------------|-----------------------------------------------------|
|                                                      | Custom-made database, training set 288 isolates n (%) | Custom-made database, training set 6*17 isolates n (%) | Classifier models, training set 288 isolates n (%) | Classifier models, training set 6*17 isolates n (%) | Custom-made database, training set 288 isolates n (%)                  | Custom-made database, training set 6*17 isolates n (%) | Classifier models, training set 288 isolates n (%) | Classifier models, training set 6*17 isolates n (%) |
| <b>Genus</b>                                         |                                                       |                                                        |                                                    |                                                     |                                                                        |                                                        |                                                    |                                                     |
| <i>Shigella</i> (n =217)                             | 205 (94)                                              | 196 (90)                                               | 209 (96)                                           | 157 (72)                                            | 207 (95)                                                               | 201 (93)                                               | 217 (100)                                          | 191 (88)                                            |
| <i>E. coli</i> (n = 52)                              | 26 (50)                                               | 28 (54)                                                | 11 (21)                                            | 11 (21)                                             | 35 (67)                                                                | 27 (52)                                                | 4 (8)                                              | 9 (17)                                              |
| Unassigned                                           | 1 (0.4)                                               | 1 (0.4)                                                | 0 (0)                                              | 0 (0)                                               | 0 (0)                                                                  | 2 (1)                                                  | 0 (0)                                              | 0 (0)                                               |
| <b>Pathotype</b>                                     |                                                       |                                                        |                                                    |                                                     |                                                                        |                                                        |                                                    |                                                     |
| <i>Shigella</i> /EIEC (n = 248)                      | 233 (94)                                              | 222 (90)                                               | 145 (58)                                           | 157 (63)                                            | 245 (99)                                                               | 241 (97)                                               | 147 (59)                                           | 242 (96)                                            |
| Other <i>E. coli</i> (n =21)                         | 6 (29)                                                | 10 (48)                                                | 14 (67)                                            | 1 (5)                                               | 11 (52)                                                                | 9 (43)                                                 | 6 (29)                                             | 1 (5)                                               |
| Unassigned                                           | 1 (0.4)                                               | 1 (0.4)                                                | 0 (0)                                              | 0 (0)                                               | 0 (0)                                                                  | 2 (1)                                                  | 0 (0)                                              | 0 (0)                                               |
| <b>Group</b>                                         |                                                       |                                                        |                                                    |                                                     |                                                                        |                                                        |                                                    |                                                     |
| <i>Shigella</i> (n = 217)                            | 205 (94)                                              | 196 (90)                                               | 131 (60)                                           | 142 (65)                                            | 207 (95)                                                               | 201 (93)                                               | 134 (62)                                           | 208 (96)                                            |
| EIEC (n = 31)                                        | 9 (29)                                                | 5 (16)                                                 | 2 (6)                                              | 1 (3)                                               | 19 (61)                                                                | 11 (35)                                                | 0 (0)                                              | 1 (3)                                               |
| Other <i>E. coli</i> (n =21)                         | 6 (29)                                                | 10 (48)                                                | 13 (62)                                            | 1 (5)                                               | 11 (52)                                                                | 9 (43)                                                 | 7 (33)                                             | 1 (5)                                               |
| Unassigned                                           | 1 (0.4)                                               | 1 (0.4)                                                | 0 (0)                                              | 0 (0)                                               | 0 (0)                                                                  | 2 (1)                                                  | 0 (0)                                              | 0 (0)                                               |
| <b>Species</b>                                       |                                                       |                                                        |                                                    |                                                     |                                                                        |                                                        |                                                    |                                                     |
| <i>S. dysenteriae</i> (n =11)                        | 5 (45)                                                | 5 (45)                                                 | 0 (0)                                              | 0 (0)                                               | 7 (64)                                                                 | 7 (64)                                                 | 0 (0)                                              | 1 (9)                                               |
| <i>S. flexneri</i> (n =77)                           | 70 (91)                                               | 59 (77)                                                | 6 (8)                                              | 0 (0)                                               | 73 (95)                                                                | 64 (83)                                                | 3 (4)                                              | 0 (0)                                               |
| <i>S. boydii</i> (n =14)                             | 1 (7)                                                 | 4 (29)                                                 | 0 (0)                                              | 0 (0)                                               | 0 (0)                                                                  | 3 (21)                                                 | 0 (0)                                              | 0 (0)                                               |
| <i>S. sonnei</i> (n = 115)                           | 110 (96)                                              | 105 (91)                                               | 92 (80)                                            | 60 (52)                                             | 112 (97)                                                               | 112 (97)                                               | 101 (88)                                           | 113 (98)                                            |
| EIEC (n = 31)                                        | 9 (29)                                                | 5 (16)                                                 | 1 (3)                                              | 2 (6)                                               | 19 (61)                                                                | 11 (35)                                                | 3 (10)                                             | 4 (13)                                              |
| Other <i>E. coli</i> (n =21)                         | 6 (29)                                                | 10 (48)                                                | 12 (57)                                            | 2 (10)                                              | 11 (52)                                                                | 9 (43)                                                 | 4 (19)                                             | 4 (19)                                              |
| Unassigned                                           | 1 (0.4)                                               | 1 (0.4)                                                | 0 (0)                                              | 0 (0)                                               | 0 (0)                                                                  | 2 (1)                                                  | 0 (0)                                              | 0 (0)                                               |

Percentage correct identification of total isolates (n =269) is displayed.
